# Supplementary material for: Expanding the coverage of MISR aerosol retrievals over shallow, turbid, and eutrophic waters
Source: Copernicus journal article supplement (doi:10.5194/egusphere-2023-1250), 2023-06-26
Supplement: Supplementary file [file egusphere-2023-1250-AC2-supplement.pdf]

The authors would like to thank Anonymous Referee #2 for their comments on our manuscript entitled, "Expanding the coverage of MISR aerosol retrievals over shallow, turbid, and eutrophic waters." Below, we have addressed their comments and made the necessary changes in the manuscript.

**"L103: It sounds odd for an algorithm to 'contain' something; perhaps 'considers'."**

We indented to mean that the LUT, not the algorithm, contains 74 mixtures and have made the following clarification:

"The current operational retrieval algorithm (V23) LUT effectively contains 74 unique aerosol mixtures"

**"Eq.2: There is a  $\tau$  on the LHS of this equation but not on the RHS. I believe  $\rho_m$  is the function of AOD. (Same the same is true of later equations.)"**

For clarity we have remove the ( $\tau$ ) on the LHS of Eqs. 2 and 3. The text states that they are both calculated at several mixtures and AODs.

**"L416: Berenfeld et al. 2005 is article number GB1006." and others**

It looks like article numbers shouldn't be included in AMT references:

"Please supply the full author list with last name followed by initials. After the list of authors, the complete reference title needs to be named. Journal names are abbreviated according to the Journal Title Abbreviations by Caltech Library, followed by the volume number, the complete page numbers (first and last page), the digital object identifier (DOI), and the publication year."

<https://www.atmospheric-measurement-techniques.net/submission.html#references>
